# Supplementary material for: My Cat and Me—A Study of Cat Owner Perceptions of Their Bond and Relationship
Source: MDPI journal article supplement (doi:10.3390/ani11061601), 2021-05-29
Supplement: s1 [file s1]

## Supplementary materials

Table S1: Questions in parts 1, 2 and 3 of the survey as they were asked to the participants in the study - note for conciseness formatting changes have been made and response options removed from Parts 1 and 2.

| PART 1 - Owner demographic information                                                                                     |                      |                 |                 |               |              |              |                |                |
|----------------------------------------------------------------------------------------------------------------------------|----------------------|-----------------|-----------------|---------------|--------------|--------------|----------------|----------------|
| What is your age (to the nearest complete year)?                                                                           |                      |                 |                 |               |              |              |                |                |
| With which gender do you most closely identify?                                                                            |                      |                 |                 |               |              |              |                |                |
| Number of people in your household?                                                                                        |                      |                 |                 |               |              |              |                |                |
| In which country do you currently reside?                                                                                  |                      |                 |                 |               |              |              |                |                |
| In which country did you grow up in?                                                                                       |                      |                 |                 |               |              |              |                |                |
| PART 2 - Cat demographic information                                                                                       |                      |                 |                 |               |              |              |                |                |
| What is your cat's age (in years)?                                                                                         |                      |                 |                 |               |              |              |                |                |
| What is your cat's gender?                                                                                                 |                      |                 |                 |               |              |              |                |                |
| Where did you get your cat from?                                                                                           |                      |                 |                 |               |              |              |                |                |
| How many cats do you have?                                                                                                 |                      |                 |                 |               |              |              |                |                |
| Does your cat have any access outdoors?                                                                                    |                      |                 |                 |               |              |              |                |                |
| PART 3, Subsection 1 - Owner's caregiving style                                                                            |                      |                 |                 |               |              |              |                |                |
| Item                                                                                                                       | Likert scale options |                 |                 |               |              |              |                |                |
|                                                                                                                            | Strongly disagree    | Mainly disagree | Partly disagree | Neutral/mixed | Partly agree | Mainly agree | Strongly agree | Not applicable |
| I encourage my cat to sleep with me on my bed                                                                              |                      |                 |                 |               |              |              |                |                |
| I feel my cat doesn't like me as much as like him/her                                                                      |                      |                 |                 |               |              |              |                |                |
| I am comfortable with being emotionally distant from my cat                                                                |                      |                 |                 |               |              |              |                |                |
| I would feel sad if I thought that my cat liked others more than me                                                        |                      |                 |                 |               |              |              |                |                |
| When my cat is eating I like to stay with him/her until he/she has finished                                                |                      |                 |                 |               |              |              |                |                |
| I consider my cat part of the family                                                                                       |                      |                 |                 |               |              |              |                |                |
| I am not able to understand what my cat needs                                                                              |                      |                 |                 |               |              |              |                |                |
| I don't think it is necessary to play with my cat regularly                                                                |                      |                 |                 |               |              |              |                |                |
| I get upset with my cat if he/she seeks attention when I am busy                                                           |                      |                 |                 |               |              |              |                |                |
| I shout at my cat when he/she does something wrong                                                                         |                      |                 |                 |               |              |              |                |                |
| I expect my cat to follow my house rules                                                                                   |                      |                 |                 |               |              |              |                |                |
| I provide food, water and shelter. My cat should be able to sort everything else he/she needs.                             |                      |                 |                 |               |              |              |                |                |
| I would cancel my plans in order to avoid leaving my cat alone                                                             |                      |                 |                 |               |              |              |                |                |
| Sometimes I allow my cat to do things that I don't allow at other times                                                    |                      |                 |                 |               |              |              |                |                |
| I enjoy playing with my cat                                                                                                |                      |                 |                 |               |              |              |                |                |
| Sometimes I start playing with my cat but then decide against it and so stop playing quite abruptly.                       |                      |                 |                 |               |              |              |                |                |
| I think it is difficult to teach my cat what I want him/her to do                                                          |                      |                 |                 |               |              |              |                |                |
| I am comfortable with the relationship I have with my cat                                                                  |                      |                 |                 |               |              |              |                |                |
| Sometimes I feel I am not a good enough owner                                                                              |                      |                 |                 |               |              |              |                |                |
| I am very protective of my cat                                                                                             |                      |                 |                 |               |              |              |                |                |
| I make sure my cat gives me attention whenever I want it                                                                   |                      |                 |                 |               |              |              |                |                |
| I don't think my cat needs me much                                                                                         |                      |                 |                 |               |              |              |                |                |
| I enjoy doing all the things related to caring for my cat (i.e feeding, cleaning litter box, playing, etc)                 |                      |                 |                 |               |              |              |                |                |
| I talk to my cat everyday                                                                                                  |                      |                 |                 |               |              |              |                |                |
| I don't have strong feelings for my cat                                                                                    |                      |                 |                 |               |              |              |                |                |
| I recognise when my cat needs help                                                                                         |                      |                 |                 |               |              |              |                |                |
| I always follow the vet's instructions for the health of my cat                                                            |                      |                 |                 |               |              |              |                |                |
| I worry to much about my cat                                                                                               |                      |                 |                 |               |              |              |                |                |
| I am often impatient with my cat                                                                                           |                      |                 |                 |               |              |              |                |                |
| If I were to tell my cat off and he/she would start purring or meowing at me, I would stop and try to make up with him/her |                      |                 |                 |               |              |              |                |                |

|                                                                                                        |                      |                 |                 |               |              |              |                |                |
|--------------------------------------------------------------------------------------------------------|----------------------|-----------------|-----------------|---------------|--------------|--------------|----------------|----------------|
| I'm interested in learning things that will help me take better care of my cat                         |                      |                 |                 |               |              |              |                |                |
| When my cat does something wrong, I feel that he/she did that to upset me                              |                      |                 |                 |               |              |              |                |                |
| When I am upset with my cat, I stay away from him/her                                                  |                      |                 |                 |               |              |              |                |                |
| I don't want my cat to make mistakes and so I step in whenever I think he/she is making a bad decision |                      |                 |                 |               |              |              |                |                |
| My cat is very independent. I barely notice he/she lives at home with me                               |                      |                 |                 |               |              |              |                |                |
| I often feel the need to support my cat through stressful situations                                   |                      |                 |                 |               |              |              |                |                |
| My cat has a unique personality                                                                        |                      |                 |                 |               |              |              |                |                |
| I don't think it is necessary to reward my cat for doing things he/she knows he/she should be doing    |                      |                 |                 |               |              |              |                |                |
| <b>PART 3, Subsection 2 - Emotional basis to the relationship between the cat and its owner</b>        |                      |                 |                 |               |              |              |                |                |
| Item                                                                                                   | Likert Scale options |                 |                 |               |              |              |                |                |
|                                                                                                        | Strongly disagree    | Mainly disagree | Partly disagree | Neutral/mixed | Partly agree | Mainly agree | Strongly agree | Not applicable |
| My cat treats me like a toy                                                                            |                      |                 |                 |               |              |              |                |                |
| My cat thinks of me as a food dispensing machine                                                       |                      |                 |                 |               |              |              |                |                |
| There aren't enough hours in the day to give my cat all the attention he/she would like                |                      |                 |                 |               |              |              |                |                |
| I deliberately don't let my cat get all that he/she wants                                              |                      |                 |                 |               |              |              |                |                |
| Sometimes my cat needs some space                                                                      |                      |                 |                 |               |              |              |                |                |
| When sitting on my lap, being fussed, my cat's tail will sometimes thrash                              |                      |                 |                 |               |              |              |                |                |
| My cat gets angry if I don't give him what he/she wants                                                |                      |                 |                 |               |              |              |                |                |
| I think my cat is afraid of me                                                                         |                      |                 |                 |               |              |              |                |                |
| my cat sometimes runs away from me or suddenly hisses or swipes at me for no good reason               |                      |                 |                 |               |              |              |                |                |
| My cat will often hide from me                                                                         |                      |                 |                 |               |              |              |                |                |
| I think my cat worries I would hurt him/her                                                            |                      |                 |                 |               |              |              |                |                |
| Sometimes my cat seems irritable or doesn't like to be touched for no obvious reason.                  |                      |                 |                 |               |              |              |                |                |
| Sometimes I have to make my cat uncomfortable to get certain things done (e.g. giving medication)      |                      |                 |                 |               |              |              |                |                |
| I think of my cat as like a child                                                                      |                      |                 |                 |               |              |              |                |                |
| When worried or afraid, my cat will seek me                                                            |                      |                 |                 |               |              |              |                |                |
| My cat is always there for me, when I am lonely                                                        |                      |                 |                 |               |              |              |                |                |
| I share my worries with my cat                                                                         |                      |                 |                 |               |              |              |                |                |
| I don't know what I would do without my cat                                                            |                      |                 |                 |               |              |              |                |                |
| My cat is my best friend                                                                               |                      |                 |                 |               |              |              |                |                |
| I wouldn't worry if another person took care of my cat                                                 |                      |                 |                 |               |              |              |                |                |
| My cat loves rough and tumble play                                                                     |                      |                 |                 |               |              |              |                |                |
| My cat and I often seem to work as a team that are in tune with each other                             |                      |                 |                 |               |              |              |                |                |
| Sometimes my cat shows sexual behaviour (i.e. mounting) towards me                                     |                      |                 |                 |               |              |              |                |                |
| My cat does not want me to be a part of his/her social circle                                          |                      |                 |                 |               |              |              |                |                |
| My cat will often try to make my partner or others close to me move away                               |                      |                 |                 |               |              |              |                |                |
| <b>PART 3, Subsection 3 - Traditional Attachment features</b>                                          |                      |                 |                 |               |              |              |                |                |
| Item                                                                                                   | Likert Scale options |                 |                 |               |              |              |                |                |
|                                                                                                        | Strongly disagree    | Mainly disagree | Partly disagree | Neutral/mixed | Partly agree | Mainly agree | Strongly agree | Not applicable |
| My cat is confident                                                                                    |                      |                 |                 |               |              |              |                |                |
| When I go away my cat will play with and enjoy whoever is looking after him/her                        |                      |                 |                 |               |              |              |                |                |
| My cat will not eat if I go away                                                                       |                      |                 |                 |               |              |              |                |                |
| My cat constantly follows me around the house                                                          |                      |                 |                 |               |              |              |                |                |
| If I am in a separate room with a closed door, my cat will cry until I open the door                   |                      |                 |                 |               |              |              |                |                |
| My cat will only relax if next to me                                                                   |                      |                 |                 |               |              |              |                |                |
| My cat tends to approach visitors with his/her tail up and rub him/herself on their legs               |                      |                 |                 |               |              |              |                |                |
| My cat will never sit on my lap                                                                        |                      |                 |                 |               |              |              |                |                |
| When we are both at home, I might not see my cat for the entire day                                    |                      |                 |                 |               |              |              |                |                |
| When I return home my cat seems annoyed and might even scratch/bite/hiss at me                         |                      |                 |                 |               |              |              |                |                |
| When I return home my cat will approach me with his/her tail up and rub him/herself on my legs         |                      |                 |                 |               |              |              |                |                |
| My cat wants to be close to me but will scratch/bite me if I try to touch him/her                      |                      |                 |                 |               |              |              |                |                |
| My cat will often lick my hands or face                                                                |                      |                 |                 |               |              |              |                |                |

|                                                                                                    |
|----------------------------------------------------------------------------------------------------|
| When I return home, my cat follows me around and cries, even if I give him/her attention           |
| If I leave the house, I believe my cat would be fine with someone else taking my place             |
| My cat sees our relationship as something special                                                  |
| For my cat attention is attention, whoever gives it, it doesn't matter who it comes from           |
| When I return home my cat ignores me                                                               |
| When I am about to leave the house, my cat will cry and try to leave with me                       |
| My cat will sit near whoever has the warmest or most comfortable spot                              |
| My cat visits the neighbours (even if I am at home)                                                |
| If we have visitors my cat will initially sit next to me, and may or may not approach the visitors |
| My cat will groom him/herself when I arrive home                                                   |
| I think my cat would be just as happy living with someone else (like the next door neighbour)      |
| My cat likes all people equally                                                                    |
| My cat seems to know exactly how I feel and acts accordingly                                       |
| I can never tell how my cat is going to react when I approach him/her                              |
| If my cat was anxious, people other than me, might be just as good at comforting my cat            |
| My cat appears aloof                                                                               |
| My cat is clingy. I can't even go to the toilet in peace.                                          |

Table S2 - Table comparison of Dataset A (responses that remained after removing all the blank responses and all the responses with inappropriate cat and owner age entries) with Dataset B (responses that remained after removing all the responses that had at least one blank answer to one of the 26 reliable items in the questionnaire) in all the Owner and Cat Demographics.

| Demographic                                     |                               | Dataset A<br>(6357 responses)  | Dataset B<br>(3994 responses)  |
|-------------------------------------------------|-------------------------------|--------------------------------|--------------------------------|
| Language                                        | English                       | 6137 (96.5%)                   | 3877 (97.1%)                   |
|                                                 | Portuguese                    | 220 (3.5%)                     | 117 (2.9%)                     |
| Owner age (mean, standard deviation, min - max) |                               | 41.81 +/- 12.98<br>(18y - 85y) | 41.49 +/- 12.75<br>(18y - 83y) |
| Owner gender                                    | Female                        | 5826 (91.7%)                   | 3662 (91.7%)                   |
|                                                 | Male                          | 405 (6.4%)                     | 258 (6.5%)                     |
|                                                 | Transgender female            | 5 (0.1%)                       | 0 (0%)                         |
|                                                 | Transgender male              | 14 (0.2%)                      | 9 (0.2%)                       |
|                                                 | Gender variant/non-conforming | 63 (1%)                        | 42 (1.1%)                      |
|                                                 | Not listed                    | 23 (0.4%)                      | 15 (0.12%)                     |
| Prefer not to answer                            |                               | 24 (0.3%)                      | 8 (0.2%)                       |
| Household size                                  | 1                             | 1107 (17.5%)                   | 694 (17.4%)                    |
|                                                 | 2                             | 2850 (44.8%)                   | 1834 (45.9%)                   |
|                                                 | 3 or 4                        | 2037 (32.1%)                   | 1250 (31.3%)                   |
|                                                 | > 4                           | 363 (5.7%)                     | 216 (5.4%)                     |
| Country of residence                            | United Kingdom                | 4523 (71.1%)                   | 2867 (71.7%)                   |
|                                                 | United States                 | 644 (10.2%)                    | 399 (10%)                      |
|                                                 | Ireland                       | 212 (3.3%)                     | 130 (3.3%)                     |
|                                                 | South Africa                  | 135 (2.2%)                     | 99 (2.5%)                      |
|                                                 | Australia                     | 151 (2.4%)                     | 97 (2.5%)                      |
|                                                 | Portugal                      | 158 (2.5%)                     | 91 (2.3%)                      |
|                                                 | Canada                        | 67 (1.1%)                      | 45 (1.2%)                      |
|                                                 | Other                         | 467 (7.2%)                     | 266 (6.5%)                     |
| Country grew up in                              | United Kingdom                | 4331 (68.1%)                   | 2750 (68.8%)                   |
|                                                 | United States                 | 671 (10.6%)                    | 422 (10.6%)                    |
|                                                 | South Africa                  | 172 (2.7%)                     | 113 (2.9%)                     |
|                                                 | Ireland                       | 159 (2.5%)                     | 104 (2.6%)                     |
|                                                 | Portugal                      | 130 (2%)                       | 98 (2.5%)                      |
|                                                 | Australia                     | 169 (2.7%)                     | 81 (2%)                        |
|                                                 | Canada                        | 94 (1.5%)                      | 62 (1.6%)                      |

|                                              |                 |                            |                            |
|----------------------------------------------|-----------------|----------------------------|----------------------------|
|                                              | Other           | 631 (9.9%)                 | 364 (9%)                   |
| Cat age (mean standard deviation, min - max) |                 | 7.07 +/- 4.65<br>(0 - 25y) | 7.17 +/- 4.63<br>(0 - 25y) |
| Cat gender                                   | Male entire     | 165 (2.6%)                 | 91 (2.3%)                  |
|                                              | Female entire   | 203 (3.2%)                 | 108 (2.7%)                 |
|                                              | Male neutered   | 3113 (49%)                 | 2006 (50.2%)               |
|                                              | Female neutered | 2872 (45%)                 | 1788 (44.8%)               |
|                                              | Not sure        | 4 (0.1%)                   | 1 (0%)                     |
| Cat origin                                   | Breeder         | 612 (9.6%)                 | 397 (10%)                  |
|                                              | Shelter/charity | 2461 (38.7%)               | 1547 (38.7%)               |
|                                              | Friend          | 1197 (18.9%)               | 743 (18.6%)                |
|                                              | Petshop         | 63 (1%)                    | 36 (0.9%)                  |
|                                              | Advert          | 623 (9.8%)                 | 411 (10.3%)                |
|                                              | Other           | 1401 (22%)                 | 860 (21.5%)                |
| Number of cats                               | 1               | 2603 (40.9%)               | 1586 (39.7%)               |
|                                              | 2               | 2062 (32.4%)               | 1345 (33.6%)               |
|                                              | 3               | 774 (12.2%)                | 480 (12%)                  |
|                                              | 4 or more       | 918 (14.5%)                | 583 (14.6%)                |
| Access outdoors                              | Yes             | 4484 (70.5%)               | 2835 (71%)                 |
|                                              | No              | 1873 (29.5%)               | 1159 (29%)                 |

Table S3 - Details of the reliability assessment. Results of the Pearson correlation, results of the Wilcoxon test and outcome for each of the 93 items in Part 3 of the questionnaire survey.

| Item                                                                        | Pearson correlation                              |                          | Wilcoxon test                                | Outcome                                 |
|-----------------------------------------------------------------------------|--------------------------------------------------|--------------------------|----------------------------------------------|-----------------------------------------|
|                                                                             | Correlation statistically significant (p < 0.05) | Correlation co-efficient | 2 answers significantly different (p < 0.05) |                                         |
| Part 3, Subsection 1 – Owner caregiving style                               |                                                  |                          |                                              |                                         |
| I encourage my cat to sleep with me on my bed                               | yes                                              | 0.652                    | no                                           | Removed from dataset.                   |
| I feel my cat doesn't like me as much as like him/her                       | yes                                              | 0.772                    | no                                           | Remained in dataset. Used for analysis. |
| I am comfortable with being emotionally distant from my cat                 | yes                                              | 0.722                    | no                                           | Remained in dataset. Used for analysis. |
| I would feel sad if I thought that my cat liked others more than me         | yes                                              | 0.663                    | no                                           | Removed from dataset.                   |
| When my cat is eating I like to stay with him/her until he/she has finished | yes                                              | 0.813                    | no                                           | Remained in dataset. Used for analysis. |
| I consider my cat part of the family                                        | yes                                              | 0.758                    | no                                           | Remained in dataset. Used for analysis. |
| I am not able to understand what my cat needs                               | no                                               | 0.063                    | no                                           | Removed from dataset.                   |
| I don't think it is necessary to play with my cat regularly                 | yes                                              | 0.718                    | no                                           | Remained in dataset. Used for analysis. |
| I get upset with my cat if he/she seeks attention when I am busy            | yes                                              | 0.467                    | no                                           | Removed from dataset.                   |

|                                                                                                                                   |     |       |     |                                         |
|-----------------------------------------------------------------------------------------------------------------------------------|-----|-------|-----|-----------------------------------------|
| <b>I shout at my cat when he/she does something wrong</b>                                                                         | yes | 0.508 | no  | Removed from dataset.                   |
| <b>I expect my cat to follow my house rules</b>                                                                                   | yes | 0.577 | yes | Removed from dataset.                   |
| <b>I provide food, water and shelter. My cat should be able to sort everything else he/she needs.</b>                             | yes | 0.593 | no  | Removed from dataset.                   |
| <b>I would cancel my plans in order to avoid leaving my cat alone</b>                                                             | yes | 0.656 | no  | Removed from dataset.                   |
| <b>Sometimes I allow my cat to do things that I don't allow at other times</b>                                                    | yes | 0.350 | no  | Removed from dataset.                   |
| <b>I enjoy playing with my cat</b>                                                                                                | no  | 0.362 | no  | Removed from dataset.                   |
| <b>Sometimes I start playing with my cat but then decide against it and so stop playing quite abruptly.</b>                       | yes | 0.529 | no  | Removed from dataset.                   |
| <b>I think it is difficult to teach my cat what I want him/her to do</b>                                                          | yes | 0.534 | no  | Removed from dataset.                   |
| <b>I am comfortable with the relationship I have with my cat</b>                                                                  | no  | 0.085 | no  | Removed from dataset.                   |
| <b>Sometimes I feel I am not a good enough owner</b>                                                                              | yes | 0.586 | no  | Removed from dataset.                   |
| <b>I am very protective of my cat</b>                                                                                             | yes | 0.784 | no  | Remained in dataset. Used for analysis. |
| <b>I make sure my cat gives me attention whenever I want it</b>                                                                   | yes | 0.419 | no  | Removed from dataset.                   |
| <b>I don't think my cat needs me much</b>                                                                                         | yes | 0.595 | no  | Removed from dataset.                   |
| <b>I enjoy doing all the things related to caring for my cat (i.e feeding, cleaning litter box, playing, etc)</b>                 | yes | 0.553 | no  | Removed from dataset.                   |
| <b>I talk to my cat everyday</b>                                                                                                  | yes | 0.718 | no  | Remained in dataset. Used for analysis. |
| <b>I don't have strong feelings for my cat</b>                                                                                    | yes | 0.330 | no  | Removed from dataset.                   |
| <b>I recognise when my cat needs help</b>                                                                                         | no  | 0.237 | no  | Removed from dataset.                   |
| <b>I always follow the vet's instructions for the health of my cat</b>                                                            | no  | 0.188 | no  | Removed from dataset.                   |
| <b>I worry to much about my cat</b>                                                                                               | yes | 0.704 | no  | Remained in dataset. Used for analysis. |
| <b>I am often impatient with my cat</b>                                                                                           | yes | 0.576 | no  | Removed from dataset.                   |
| <b>If I were to tell my cat off and he/she would start purring or meowing at me, I would stop and try to make up with him/her</b> | yes | 0.703 | no  | Remained in dataset. Used for analysis. |
| <b>I'm interested in learning things that will help me take better care of my cat</b>                                             | yes | 0.628 | no  | Removed from dataset.                   |

|                                                                                                        |     |       |     |                                         |
|--------------------------------------------------------------------------------------------------------|-----|-------|-----|-----------------------------------------|
| When my cat does something wrong, I feel that he/she did that to upset me                              | yes | 0.652 | no  | Removed from dataset.                   |
| When I am upset with my cat, I stay away from him/her                                                  | yes | 0.638 | no  | Removed from dataset.                   |
| I don't want my cat to make mistakes and so I step in whenever I think he/she is making a bad decision | yes | 0.576 | no  | Removed from dataset.                   |
| My cat is very independent. I barely notice he/she lives at home with me                               | yes | 0.627 | yes | Removed from dataset.                   |
| I often feel the need to support my cat through stressful situations                                   | yes | 0.697 | no  | Removed from dataset.                   |
| My cat has a unique personality                                                                        | yes | 0.627 | no  | Removed from dataset.                   |
| I don't think it is necessary to reward my cat for doing things he/she knows he/she should be doing    | yes | 0.560 | no  | Removed from dataset.                   |
| <i>Subsection balance (items retained/total items in Subsection 1)</i>                                 |     |       |     | <b>9 / 38</b>                           |
| <b>Part 3, Subsection 2 – Emotional framework</b>                                                      |     |       |     |                                         |
| My cat treats me like a toy                                                                            | yes | 0.441 | no  | Removed from dataset.                   |
| My cat thinks of me as a food dispensing machine                                                       | yes | 0.586 | no  | Removed from dataset.                   |
| There aren't enough hours in the day to give my cat all the attention he/she would like                | yes | 0.560 | no  | Removed from dataset.                   |
| I deliberately don't let my cat get all that he/she wants                                              | yes | 0.545 | no  | Removed from dataset.                   |
| Sometimes my cat needs some space                                                                      | yes | 0.729 | yes | Removed from dataset.                   |
| When sitting on my lap, being fussed, my cat's tail will sometimes thrash                              | yes | 0.835 | no  | Remained in dataset. Used for analysis. |
| My cat gets angry if I don't give him what he/she wants                                                | yes | 0.627 | no  | Removed from dataset.                   |
| I think my cat is afraid of me                                                                         | no  | 0.261 | no  | Removed from dataset.                   |
| my cat sometimes runs away from me or suddenly hisses or swipes at me for no good reason               | yes | 0.529 | no  | Removed from dataset.                   |
| My cat will often hide from me                                                                         | yes | 0.453 | no  | Removed from dataset.                   |
| I think my cat worries I would hurt him/her                                                            | yes | 0.270 | no  | Removed from dataset.                   |
| Sometimes my cat seems irritable or doesn't like to be touched for no obvious reason.                  | Yes | 0.349 | no  | Removed from dataset.                   |
| Sometimes I have to make my cat uncomfortable to get certain things done (e.g. giving medication)      | yes | 0.619 | no  | Removed from dataset.                   |

|                                                                                          |     |       |     |                                         |
|------------------------------------------------------------------------------------------|-----|-------|-----|-----------------------------------------|
| I think of my cat as like a child                                                        | yes | 0.890 | no  | Remained in dataset. Used for analysis. |
| When worried or afraid, my cat will seek me                                              | yes | 0.708 | no  | Remained in dataset. Used for analysis. |
| My cat is always there for me, when I am lonely                                          | yes | 0.746 | yes | Removed from dataset.                   |
| I share my worries with my cat                                                           | yes | 0.673 | no  | Removed from dataset.                   |
| I don't know what I would do without my cat                                              | yes | 0.724 | no  | Remained in dataset. Used for analysis. |
| My cat is my best friend                                                                 | yes | 0.794 | no  | Remained in dataset. Used for analysis. |
| I wouldn't worry if another person took care of my cat                                   | yes | 0.293 | no  | Removed from dataset.                   |
| My cat loves rough and tumble play                                                       | yes | 0.650 | no  | Removed from dataset.                   |
| My cat and I often seem to work as a team that are in tune with each other               | yes | 0.766 | no  | Remained in dataset. Used for analysis. |
| Sometimes my cat shows sexual behaviour (i.e. mounting) towards me                       | yes | 0.416 | yes | Removed from dataset.                   |
| My cat does not want me to be a part of his/her social circle                            | no  | 0.030 | no  | Removed from dataset.                   |
| My cat will often try to make my partner or others close to me move away                 | yes | 0.699 | no  | Removed from dataset.                   |
| <i>Subsection balance (items retained/total items in Subsection 2)</i>                   |     |       |     | <b>6 / 25</b>                           |
| <b>Part 3, Subsection 3 – Cat-owner bond</b>                                             |     |       |     |                                         |
| My cat is confident                                                                      | yes | 0.699 | no  | Removed from dataset.                   |
| When I go away my cat will play with and enjoy whoever is looking after him/her          | yes | 0.731 | no  | Remained in dataset. Used for analysis. |
| My cat will not eat if I go away                                                         | yes | 0.782 | no  | Remained in dataset. Used for analysis. |
| My cat constantly follows me around the house                                            | yes | 0.726 | no  | Remained in dataset. Used for analysis. |
| If I am in a separate room with a closed door, my cat will cry until I open the door     | yes | 0.721 | no  | Remained in dataset. Used for analysis. |
| My cat will only relax if next to me                                                     | yes | 0.689 | no  | Removed from dataset.                   |
| My cat tends to approach visitors with his/her tail up and rub him/herself on their legs | yes | 0.741 | no  | Remained in dataset. Used for analysis. |
| My cat will never sit on my lap                                                          | yes | 0.818 | no  | Remained in dataset. Used for analysis. |

|                                                                                                           |     |       |     |                                         |
|-----------------------------------------------------------------------------------------------------------|-----|-------|-----|-----------------------------------------|
| <b>When we are both at home, I might not see my cat for the entire day</b>                                | yes | 0.476 | no  | Removed from dataset.                   |
| <b>When I return home my cat seems annoyed and might even scratch/bite/hiss at me</b>                     | yes | 0.289 | no  | Removed from dataset.                   |
| <b>When I return home my cat will approach me with his/her tail up and rub him/herself on my legs</b>     | yes | 0.597 | no  | Removed from dataset.                   |
| <b>My cat wants to be close to me but will scratch/bite me if I try to touch him/her</b>                  | yes | 0.669 | no  | Removed from dataset.                   |
| <b>My cat will often lick my hands or face</b>                                                            | yes | 0.780 | no  | Remained in dataset. Used for analysis. |
| <b>When I return home, my cat follows me around and cries, even if I give him/her attention</b>           | yes | 0.427 | no  | Removed from dataset.                   |
| <b>If I leave the house, I believe my cat would be fine with someone else taking my place</b>             | yes | 0.550 | yes | Removed from dataset.                   |
| <b>My cat sees our relationship as something special</b>                                                  | yes | 0.677 | no  | Removed from dataset.                   |
| <b>For my cat attention is attention, whoever gives it, it doesn't matter who it comes from</b>           | yes | 0.614 | no  | Removed from dataset.                   |
| <b>When I return home my cat ignores me</b>                                                               | yes | 0.697 | no  | Removed from dataset.                   |
| <b>When I am about to leave the house, my cat will cry and try to leave with me</b>                       | yes | 0.707 | no  | Remained in dataset. Used for analysis. |
| <b>My cat will sit near whoever has the warmest or most comfortable spot</b>                              | yes | 0.684 | no  | Removed from dataset.                   |
| <b>My cat visits the neighbours (even if I am at home)</b>                                                | yes | 0.805 | no  | Remained in dataset. Used for analysis. |
| <b>If we have visitors my cat will initially sit next to me, and may or may not approach the visitors</b> | yes | 0.685 | no  | Removed from dataset.                   |
| <b>My cat will groom him/herself when I arrive home</b>                                                   | yes | 0.648 | no  | Removed from dataset.                   |
| <b>I think my cat would be just as happy living with someone else (like the next door neighbour)</b>      | yes | 0.722 | no  | Remained in dataset. Used for analysis. |
| <b>My cat likes all people equally</b>                                                                    | yes | 0.545 | no  | Removed from dataset.                   |
| <b>My cat seems to know exactly how I feel and acts accordingly</b>                                       | yes | 0.420 | no  | Removed from dataset.                   |
| <b>I can never tell how my cat is going to react when I approach him/her</b>                              | no  | 0.050 | no  | Removed from dataset.                   |
| <b>If my cat was anxious, people other than me, might be just as good at comforting my cat</b>            | yes | 0.601 | no  | Removed from dataset.                   |
| <b>My cat appears aloof</b>                                                                               | yes | 0.646 | no  | Removed from dataset.                   |



|                                                                                  |     |       |    |                                         |
|----------------------------------------------------------------------------------|-----|-------|----|-----------------------------------------|
| <b>My cat is clingy. I can't even go to the toilet in peace.</b>                 | yes | 0.895 | no | Remained in dataset. Used for analysis. |
| <b>Subsection balance (items retained/total items in Subsection 2)</b>           |     |       |    | <b>11/30</b>                            |
| <b>Final balance (items retained/total items in Part 3 of the questionnaire)</b> |     |       |    | <b>26/93</b>                            |

Table S4 - The twenty six reliable items retained for analysis

| Item                                                                                                                        | Scale             |                 |                 |               |              |              |                |                |
|-----------------------------------------------------------------------------------------------------------------------------|-------------------|-----------------|-----------------|---------------|--------------|--------------|----------------|----------------|
|                                                                                                                             | Strongly disagree | Mainly disagree | Partly disagree | Neutral/mixed | Partly agree | Mainly agree | Strongly agree | Not applicable |
| I don't know what I would do without my cat.                                                                                |                   |                 |                 |               |              |              |                |                |
| My cat is my best friend.                                                                                                   |                   |                 |                 |               |              |              |                |                |
| I think of my cat as like a child.                                                                                          |                   |                 |                 |               |              |              |                |                |
| I am very protective of my cat.                                                                                             |                   |                 |                 |               |              |              |                |                |
| I worry too much about my cat.                                                                                              |                   |                 |                 |               |              |              |                |                |
| If I were to tell my cat off and he/she would start purring or meowing at me, I would stop and try to make up with him/her. |                   |                 |                 |               |              |              |                |                |
| I am comfortable with being emotionally distant from my cat.                                                                |                   |                 |                 |               |              |              |                |                |
| I consider my cat part of the family.                                                                                       |                   |                 |                 |               |              |              |                |                |
| I talk to my cat every day.                                                                                                 |                   |                 |                 |               |              |              |                |                |
| My cat and I often seem to work as a team that are in tune with each other.                                                 |                   |                 |                 |               |              |              |                |                |
| I don't think it is necessary to play with my cat regularly.                                                                |                   |                 |                 |               |              |              |                |                |
| When I go away my cat will play with and enjoy whoever is looking after him/her.                                            |                   |                 |                 |               |              |              |                |                |
| My cat tends to approach visitors with his/her tail up and rub him/herself on their legs.                                   |                   |                 |                 |               |              |              |                |                |
| My cat visits the neighbours (even if I am at home).                                                                        |                   |                 |                 |               |              |              |                |                |
| I think my cat would be just as happy living with someone else (like the next door neighbour).                              |                   |                 |                 |               |              |              |                |                |
| My cat constantly follows me around the house.                                                                              |                   |                 |                 |               |              |              |                |                |
| My cat is clingy. I can't even go to the toilet in peace.                                                                   |                   |                 |                 |               |              |              |                |                |
| If I am in a separate room with a closed door, my cat will cry until I open the door.                                       |                   |                 |                 |               |              |              |                |                |
| When I am about to leave the house, my cat will cry and try to leave with me.                                               |                   |                 |                 |               |              |              |                |                |
| My cat will not eat if I go away.                                                                                           |                   |                 |                 |               |              |              |                |                |
| When worried or afraid, my cat. will seek me.                                                                               |                   |                 |                 |               |              |              |                |                |
| My cat will often lick my hands or face.                                                                                    |                   |                 |                 |               |              |              |                |                |
| When my cat is eating, I like to stay with him/her until he/she has finished.                                               |                   |                 |                 |               |              |              |                |                |
| I feel my cat doesn't like me as much as like him/her.                                                                      |                   |                 |                 |               |              |              |                |                |
| My cat will never sit on my lap.                                                                                            |                   |                 |                 |               |              |              |                |                |
| When sitting on my lap, being fussed, my cat's tail will sometimes thrash.                                                  |                   |                 |                 |               |              |              |                |                |

Figure S1 - Median PC scores for groups A, B and C.

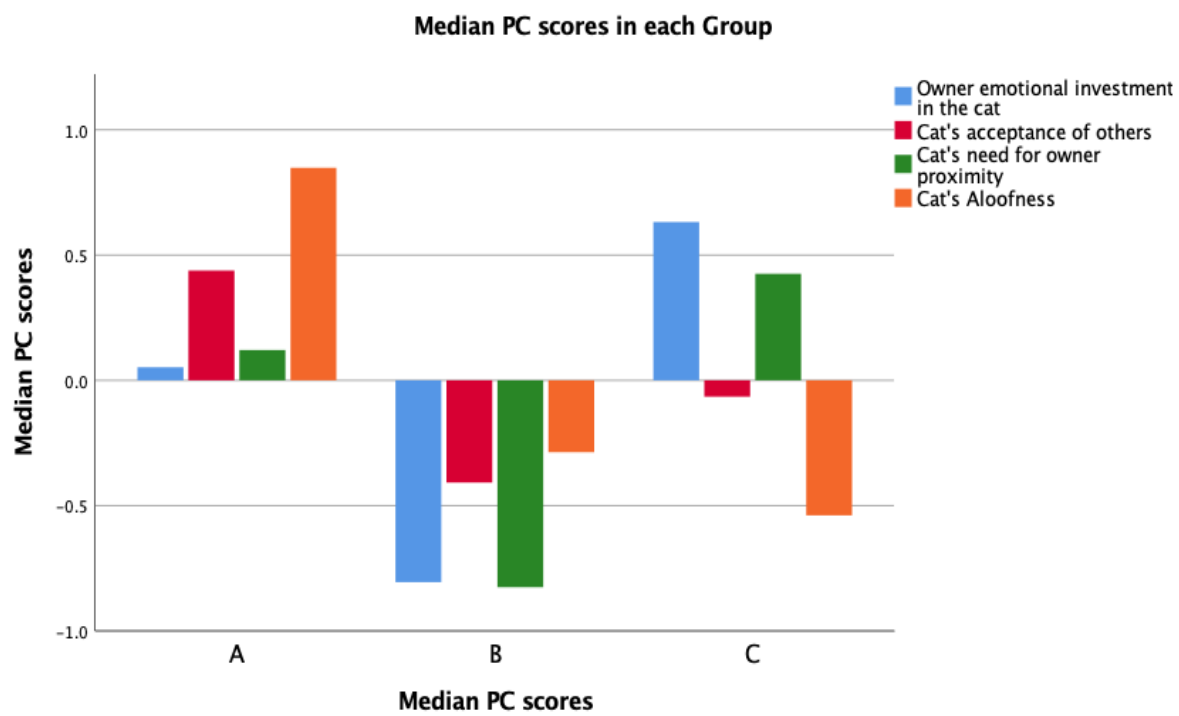

Table S5 - Principal Component Analysis, total variance explained by all components. All retained components had an eigenvalue greater than 1, (up to 5 component solution possible, based on the Kaiser criterion). The scree plot (S6) was then used to confirm whether a 4 or 5 factor solution should be used.

| Component | Total Variance Explained |                    |              |                                     |                    |                   |                                   |
|-----------|--------------------------|--------------------|--------------|-------------------------------------|--------------------|-------------------|-----------------------------------|
|           | Initial Eigenvalues      |                    |              | Extraction Sums of Squared Loadings |                    |                   | Rotation Sums of Squared Loadings |
|           | Total                    | % of Vari-<br>ance | Cumulative % | Total                               | % of Vari-<br>ance | Cumula-<br>tive % | Total                             |
| 1         | 5.091                    | 19.582             | 19.582       | 5.091                               | 19.582             | 19.582            | 4.232                             |
| 2         | 1.920                    | 7.386              | 26.968       | 1.920                               | 7.386              | 26.968            | 1.856                             |
| 3         | 1.682                    | 6.468              | 33.436       | 1.682                               | 6.468              | 33.436            | 3.292                             |
| 4         | 1.575                    | 6.059              | 39.495       | 1.575                               | 6.059              | 39.495            | 2.277                             |
| 5         | 1.167                    | 4.487              | 43.982       | 1.167                               | 4.487              | 43.982            | 1.375                             |
| 6         | .974                     | 3.746              | 47.728       |                                     |                    |                   |                                   |
| 7         | .950                     | 3.653              | 51.381       |                                     |                    |                   |                                   |
| 8         | .927                     | 3.564              | 54.945       |                                     |                    |                   |                                   |
| 9         | .887                     | 3.410              | 58.355       |                                     |                    |                   |                                   |
| 10        | .868                     | 3.338              | 61.693       |                                     |                    |                   |                                   |
| 11        | .857                     | 3.297              | 64.990       |                                     |                    |                   |                                   |
| 12        | .804                     | 3.092              | 68.082       |                                     |                    |                   |                                   |
| 13        | .781                     | 3.002              | 71.084       |                                     |                    |                   |                                   |
| 14        | .731                     | 2.810              | 73.894       |                                     |                    |                   |                                   |
| 15        | .713                     | 2.742              | 76.636       |                                     |                    |                   |                                   |
| 16        | .695                     | 2.673              | 79.309       |                                     |                    |                   |                                   |
| 17        | .688                     | 2.647              | 81.956       |                                     |                    |                   |                                   |
| 18        | .643                     | 2.471              | 84.428       |                                     |                    |                   |                                   |
| 19        | .624                     | 2.398              | 86.826       |                                     |                    |                   |                                   |
| 20        | .593                     | 2.280              | 89.107       |                                     |                    |                   |                                   |
| 21        | .572                     | 2.200              | 91.307       |                                     |                    |                   |                                   |
| 22        | .531                     | 2.041              | 93.348       |                                     |                    |                   |                                   |
| 23        | .506                     | 1.948              | 95.295       |                                     |                    |                   |                                   |
| 24        | .493                     | 1.898              | 97.194       |                                     |                    |                   |                                   |
| 25        | .436                     | 1.676              | 98.869       |                                     |                    |                   |                                   |
| 26        | .294                     | 1.131              | 100.000      |                                     |                    |                   |                                   |

Figure S2 - Scree plot of PCA of relationship items, 4 factors chosen before the inflexion point.

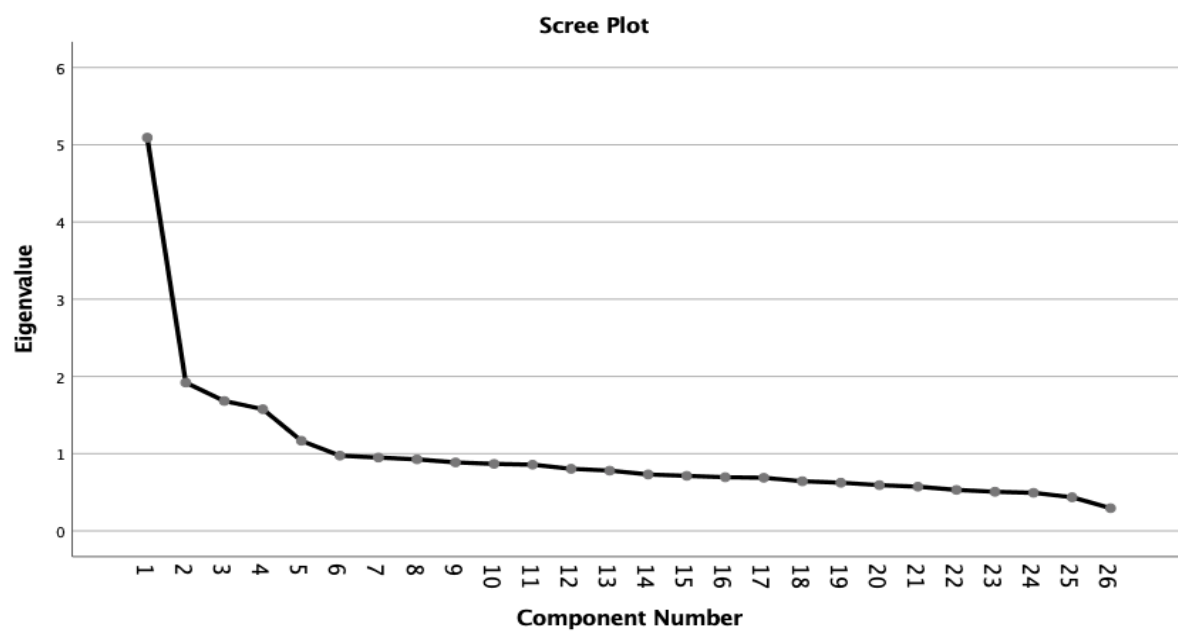

Table S6 - The median PC score for the groups A, B and C.

|         | "owner's emotional investment in the cat" | "cat's acceptance of others" | "cat's need for owner proximity" | "cat's aloofness" |
|---------|-------------------------------------------|------------------------------|----------------------------------|-------------------|
| Group A | 0.05                                      | 0.44                         | 0.12                             | 0.85              |
| Group B | -0.81                                     | -0.41                        | - 0.83                           | -0.29             |
| Group C | 0.63                                      | -0.06                        | 0.43                             | -0.54             |

Table S7 - The median PC score for the groups A, B1, B2, C1 and C2.

|          | "owner's emotional investment in the cat" | "cat's acceptance of others" | "cat's need for owner proximity" | "cat's aloofness" |
|----------|-------------------------------------------|------------------------------|----------------------------------|-------------------|
| Group A  | 0.05                                      | 0.44                         | 0.12                             | 0.85              |
| Group B1 | -0.33                                     | -1.02                        | - 0.60                           | -0.24             |
| Group B2 | -1.34                                     | 0.71                         | -0.98                            | -0.32             |
| Group C1 | 0.67                                      | -0.81                        | 0.94                             | -0.18             |
| Group C2 | 0.60                                      | 0.40                         | 0                                | -0.71             |

Figure S3 – Box plot representing the score for Groups A, B1, B2, C1 and C2 for the item: “I don’t think it is necessary to play with my cat regularly”.

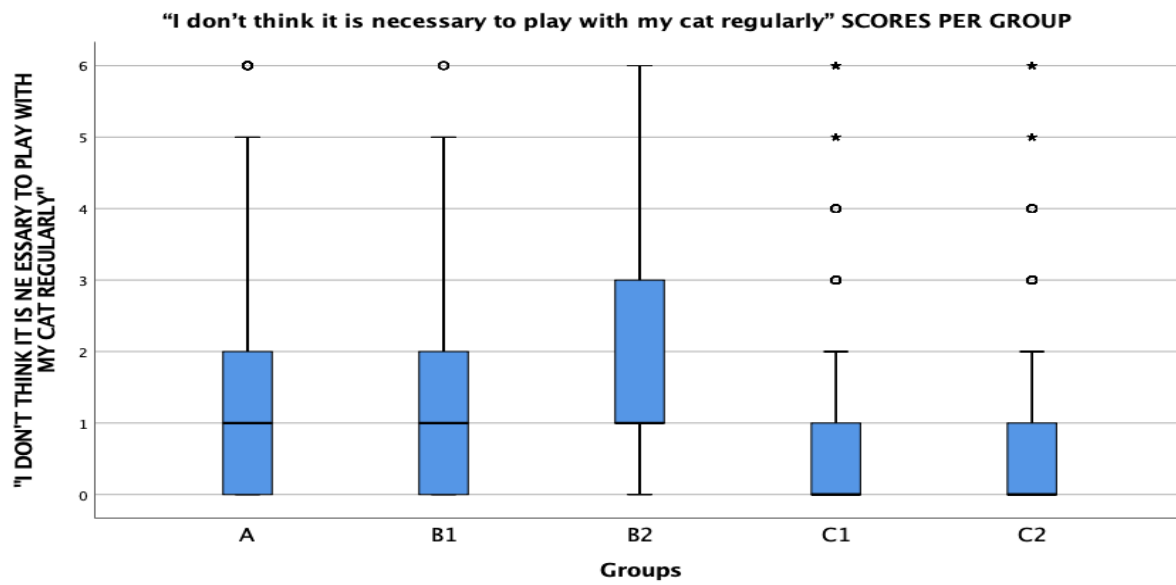

Figure S4 – Box plot representing the score for Groups A, B1, B2, C1 and C2 for the item: - “When worried or afraid, my cat will seek me”.

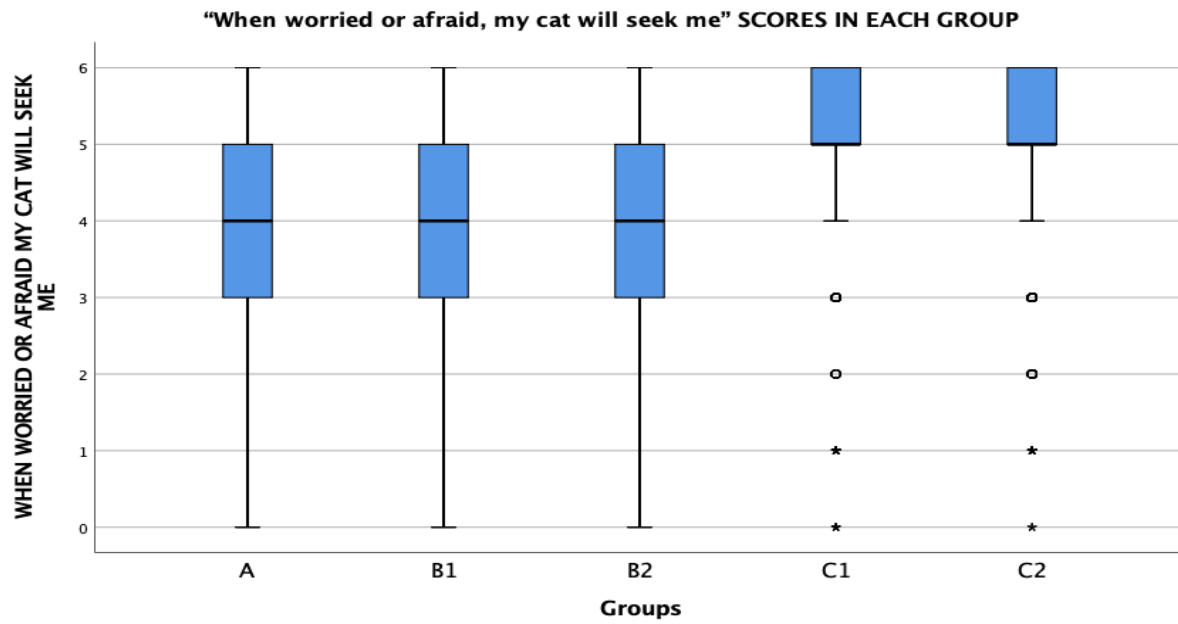



Figure S5 – Box plot representing the score for Groups A, B1, B2, C1 and C2 for the item: “My cat will often lick my hands or face”.

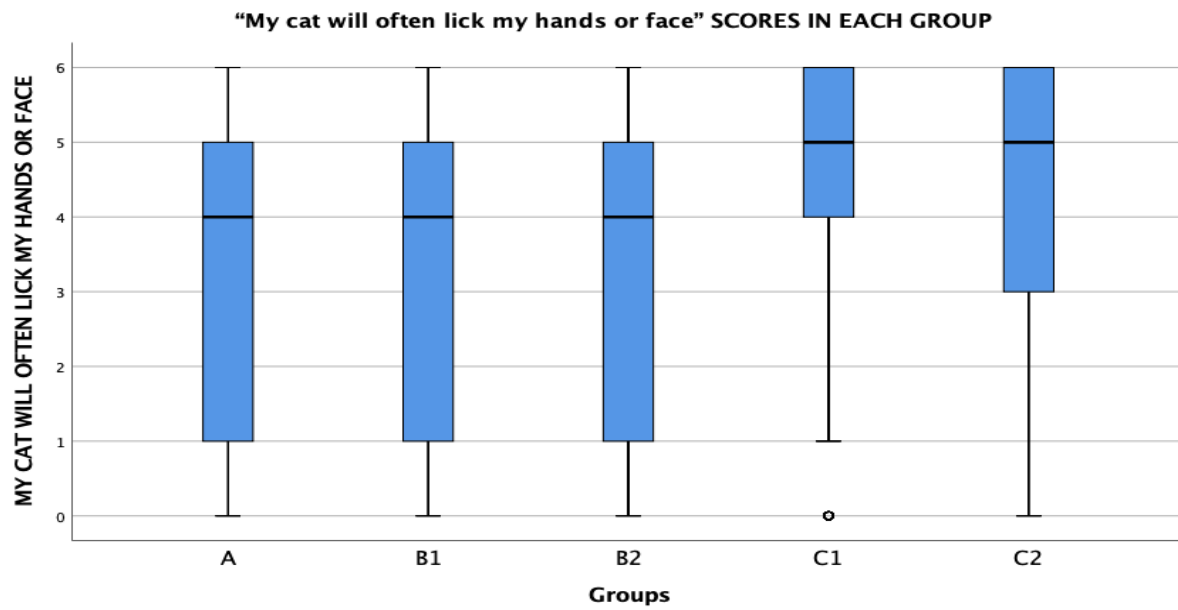

Figure S6 – Box plot representing the score for Groups A, B1, B2, C1 and C2 for the item: “When my cat is eating, I like to stay with him/her until he/she has finished”.

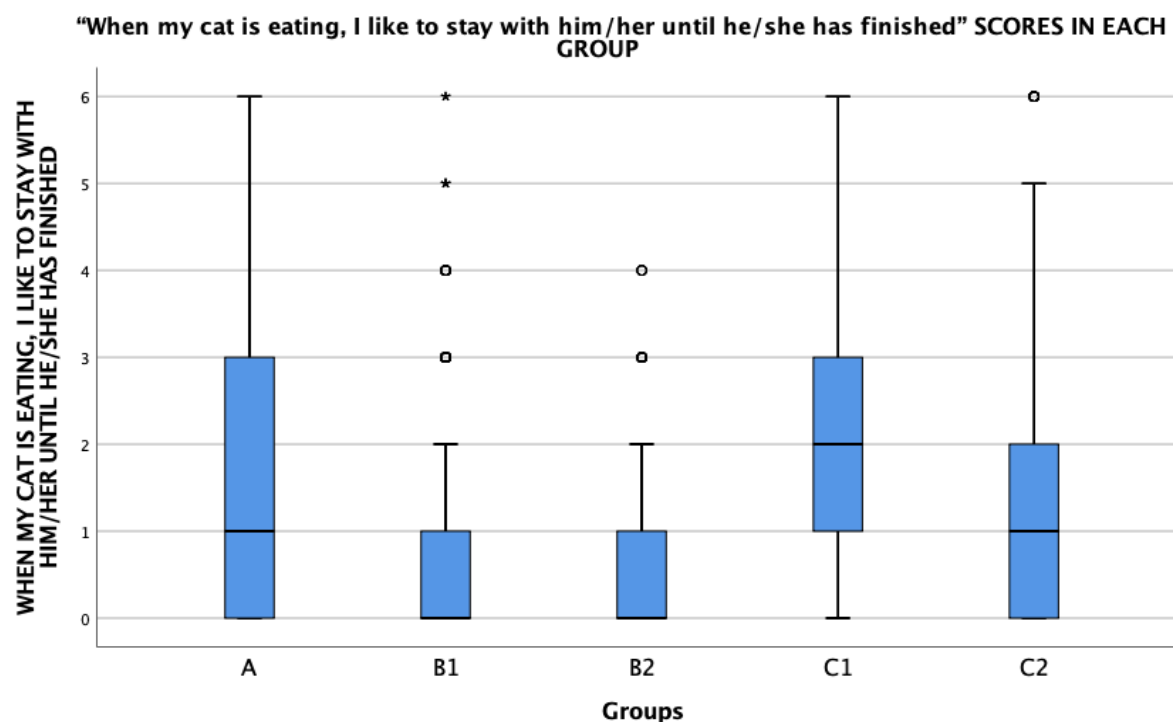

Figure S7 – Box plot representing the owner age distribution in Groups A, B1, B2, C1 and C2; mean  $\pm$  SD given on x-axis labels.

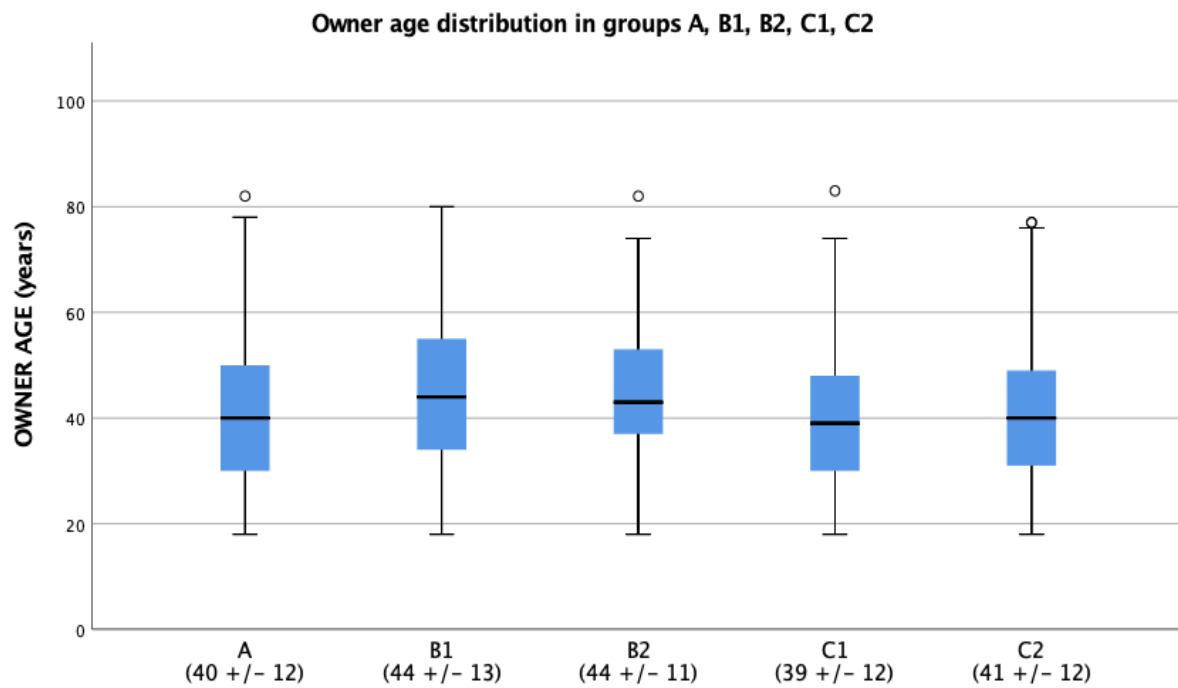

Figure S8 – Box plot representing the cat age distribution in Groups A, B1, B2, C1 and C2; mean  $\pm$  SD given on x-axis labels.

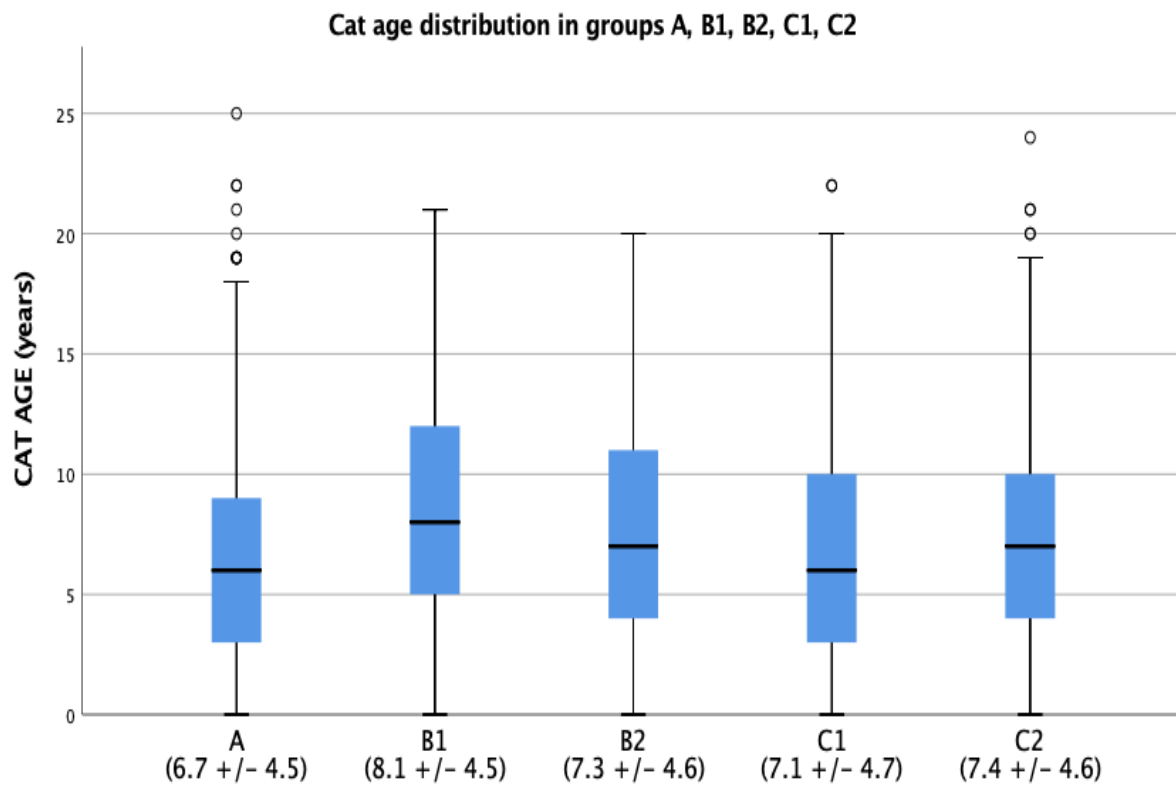

**Information S1: English and Portuguese versions of final instruments and their relationship to the clusters identified in simple language terms.**

**ME and MY CAT – a rough guide: for a more detailed guide please read the full paper:**

Please read the following statements and indicate how much you agree or disagree with each statement in relation to one cat you know well, by choosing one of the following statements: strongly agree, mainly agree, partly agree, neutral/mixed, partly disagree, mainly disagree, strongly disagree.

If the situation described in the statement hasn't occurred or been encountered by you or your cat, give your best estimate as to what you think would happen in that situation, but if you are really unsure, just ignore the question.

There are 22 statements.

| Item | Response                                                                                                                    |
|------|-----------------------------------------------------------------------------------------------------------------------------|
| 1    | I don't know what I would do without my cat.                                                                                |
| 2    | My cat is my best friend.                                                                                                   |
| 3    | I think of my cat as like a child.                                                                                          |
| 4    | I am very protective of my cat.                                                                                             |
| 5    | I worry too much about my cat.                                                                                              |
| 6    | If I were to tell my cat off and he/she would start purring or meowing at me, I would stop and try to make up with him/her. |
| 7    | I am comfortable with being emotionally distant from my cat.                                                                |
| 8    | I consider my cat part of the family.                                                                                       |
| 9    | I talk to my cat every day.                                                                                                 |
| 10   | My cat and I often seem to work as a team that are in tune with each other.                                                 |
| 11   | When I go away my cat will play with and enjoy whoever is looking after him/her.                                            |
| 12   | My cat tends to approach visitors with his/her tail up and rub him/herself on their legs.                                   |
| 13   | My cat visits the neighbours (even if I am at home).                                                                        |
| 14   | I think my cat would be just as happy living with someone else (like the next door neighbour).                              |
| 15   | My cat constantly follows me around the house.                                                                              |
| 16   | My cat is clingy. I can't even go to the toilet in peace.                                                                   |
| 17   | If I am in a separate room with a closed door, my cat will cry until I open the door.                                       |
| 18   | When I am about to leave the house, my cat will cry and try to leave with me.                                               |
| 19   | My cat will not eat if I go away.                                                                                           |
| 20   | I feel my cat doesn't like me as much as like him/her.                                                                      |
| 21   | My cat will never sit on my lap.                                                                                            |
| 22   | When sitting on my lap, being fussed, my cat's tail will sometimes thrash.                                                  |

Once you have answered the above, to find out the type of relationship you and your cat have with each other follow the flow- diagram below, the questions relate to different coloured blocks of question above. Look at these and see how you tend to respond. In this diagram “mostly agree” means you agree at some level with most of the items in that block, likewise with “mostly disagree”. More details about each type of relationship are given afterwards.

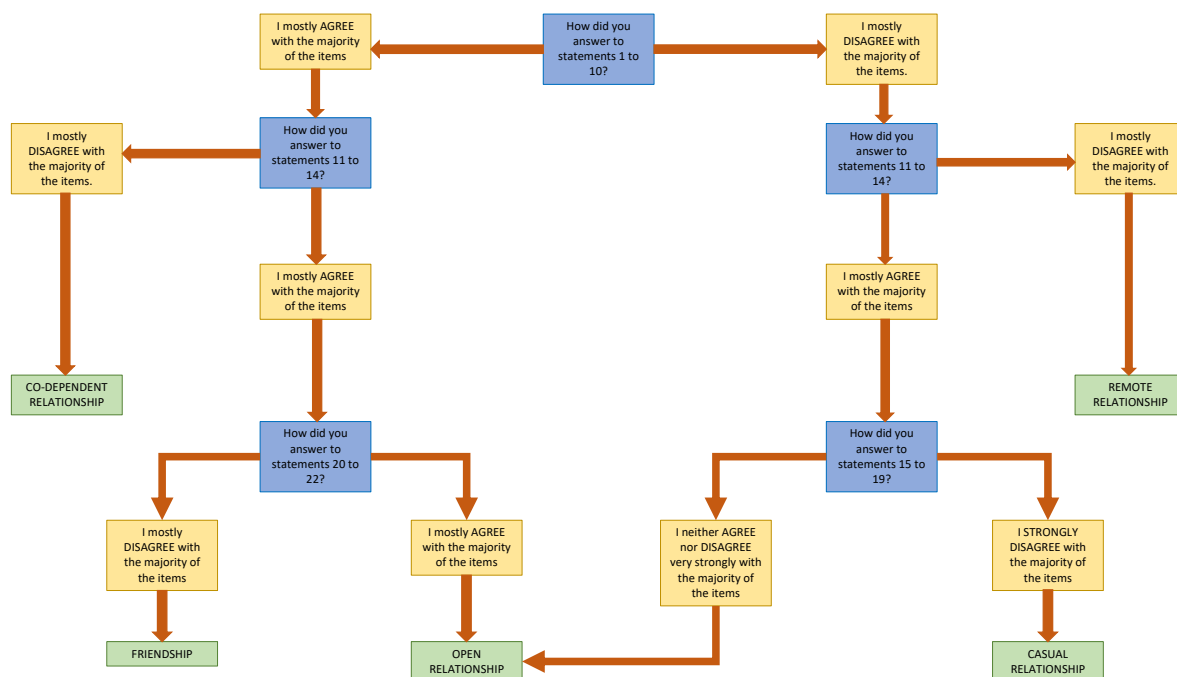

### THE CO-DEPENDENT RELATIONSHIP

This cat has often come to depend on a very emotionally invested owner (the cat is very important to the owner, possibly seen as family or as a great friend).

The owner typically plays regularly with the cat, and is seen as a part of the same social group (the cat behaves in a friendly way towards the owner, even regularly licking the owner's hands and face) and as a secure base (the cat will seek the owner when worried).

The cat doesn't relate well with others (is even likely to hide when, for example, someone comes to the house).

This cat has learned that good things come when the owner is near (for example: the owner stays with the cat whilst the cat is eating) and so, makes a considerable effort to maintain physical proximity to the owner (these cats can even be considered to be clingy) and separation can be problematic (the cat may not eat if the owner is away). This might suggest the cat has some problems with controlling its frustrations.

This relationship is common among cats living in a one-person household with no access outdoors.

### THE FRIENDSHIP

The owner is emotionally invested in the cat (worries about the cat, sees him/her as a good friend or a part of the family) and will often find time to play with the cat; the cat is very warm and friendly towards the owner (will often sit on the owner's lap), who is seen not only as part of the same social group (the cat will regularly lick the owner's hands and face) but also as a secure base (someone to seek out for comfort when the cat is worried).

The cat relates well to others (will greet or inspect visitors coming to the house and possibly even visit some neighbours). Alongside the friendly and warm relationship, cat and owner can happily function independently. This cat likes to be near the owner but doesn't feel a need to maintain physical proximity to the owner (doesn't always follow the owner around the house and may even take him/herself away to a preferred location) and separation is not likely to be problematic.

This relationship seems to occur more often in busy households with more than one cat, and the cats often have some outside access.

### OPEN RELATIONSHIP

The cats in this type of bond reflect a prototypical view of the cat as a solitary, independent animal, who should have access to the outside. The cats relate well to other people (they are likely to greet visitors or visit neighbours) and have some affiliation with the owner, but have little need for owner proximity and may be seen as aloof (possibly will not sit on the owner's lap or lick the owner's hands and face).

#### REMOTE RELATIONSHIP

Cats in this type of relationship are cared for, but not typically considered to be a close friend or part of the family; they may not be very close emotionally, even though the cat's behaviour towards the owner may be quite friendly.

These cats prefer to maintain distance from people (owners and others), possibly because they lack confidence. They will not lick the owner's hands and face, nor will they seek the owner even when worried.

#### CASUAL RELATIONSHIP

These cats have always preferred life outdoors to life in their busy households. They will often visit several homes in their territory (possibly having more than one home!) and might be gone for days at the time.

Even though these cats behave in a friendly way towards the owner they will not try to stay close to their carer (in fact, the chance are they will even make an effort to put some distance between them and their owner).

## **EU e o MEU GATO – Um guia aproximado: para uma versão mais detalhada por favor consulte o artigo completo.**

Por favor leia as seguintes afirmações e indique o quanto você concorda ou discorda de cada afirmação em relação a um gato que você conheça bem.

Para cada afirmação deverá escolher uma das seguintes opções: concordo completamente, concordo bastante, concordo um pouco, neutro, discordo um pouco, discordo bastante, discordo completamente.

Se a situação descrita na afirmação nunca ocorreu, ou nunca foi enfrentada por si ou pelo seu gato, por favor dê a sua melhor opinião sobre o que você acha que aconteceria nessa situação. Se você realmente não tiver certeza, selecione a opção "não se aplica".

Há 22 afirmações.

| Afirmação                                                                                                                       | Resposta |
|---------------------------------------------------------------------------------------------------------------------------------|----------|
| 1 Não sei o que faria sem o meu gato.                                                                                           |          |
| 2 O meu gato é o meu melhor amigo.                                                                                              |          |
| 3 Eu penso no meu gato como uma criança                                                                                         |          |
| 4 Sou muito protetor do meu gato.                                                                                               |          |
| 5 Eu preocupo-me demasiado com o meu gato.                                                                                      |          |
| 6 Se eu estivesse a ralar com o meu gato e ele comesse a ronronar ou miar, eu parava de ralar e tentava fazer as pazes com ele. |          |
| 7 Eu estou confortável em estar emocionalmente distante do meu gato.                                                            |          |
| 8 Eu considero o meu gato parte da família.                                                                                     |          |
| 9 Eu falo com o meu gato todos os dias.                                                                                         |          |
| 10 Eu e o meu gato somos uma equipa e estamos em sintonia um com o outro.                                                       |          |
| 11 Se eu for de férias o meu gato brinca e fica bem com quem estiver cuidando dele.                                             |          |
| 12 Se tiver visitas, o meu gato geralmente aproxima-se com a cauda levantada e esfrega-se nas suas pernas.                      |          |
| 13 O meu gato visita os vizinhos (mesmo que eu esteja em casa).                                                                 |          |
| 14 Eu penso que o meu gato seria igualmente feliz a viver com outra pessoa (como os vizinhos do lado).                          |          |
| 15 O meu gato segue-me constantemente pela casa.                                                                                |          |
| 16 O meu gato é pegajoso. Nem consigo ir à casa de banho em paz.                                                                |          |
| 17 Se eu estiver num quarto com a porta fechada, o meu gato chora até eu abrir a porta.                                         |          |
| 18 Quando eu estou prestes a sair de casa o meu gato chora e tenta sair comigo.                                                 |          |
| 19 O meu gato não come se eu for de férias.                                                                                     |          |
| 20 Eu sinto que o meu gato não gosta de mim tanto quanto eu gosto dele/a.                                                       |          |
| 21 O meu gato nunca se senta no meu colo.                                                                                       |          |
| 22 Quando o meu gato está no meu colo e lhe estou a tocar, por vezes ele abana a cauda.                                         |          |

Depois de ter respondido ao questionário, para descobrir o tipo de relacionamento que existe entre você e o seu gato, siga o fluxograma abaixo. As perguntas no fluxograma estão relacionadas com grupos de afirmações, assinaladas com cores diferentes no questionário. Olhe para as afirmações em cada grupo e veja como tende a responder. Neste diagrama, “concordo maioritariamente” significa que você concorda em algum nível com a maioria das afirmações naquele grupo, da mesma forma que “discordo maioritariamente” significa que você discorda em algum nível com a maioria das afirmações naquele grupo.

Mais detalhes sobre cada tipo de relacionamento são fornecidos abaixo.



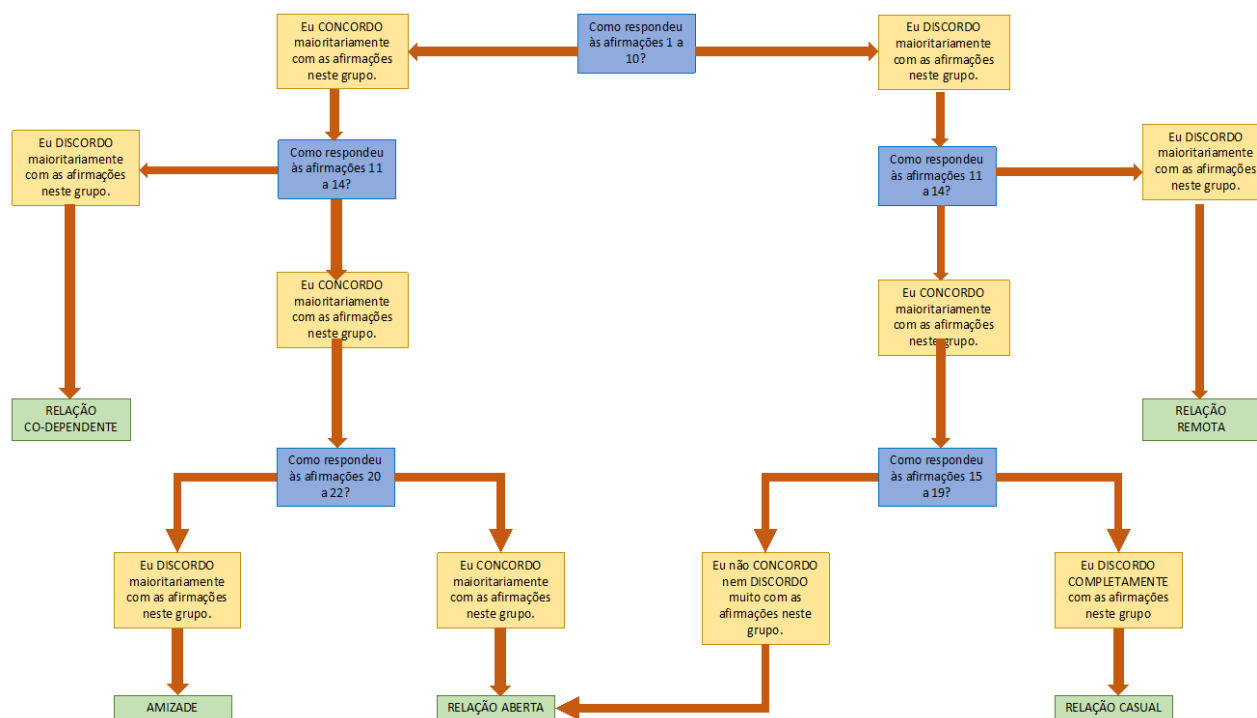

### RELAÇÃO CO-DEPENDENTE

Este gato habituou-se a depender de um dono muito emocionalmente investido (o gato é muito importante para o dono, possivelmente é considerado como parte da família ou um grande amigo).

O dono brinca regularmente com o gato que é visto como parte do mesmo grupo social (o gato tem um comportamento amigável para com o dono, lambendo-lhe regularmente as mãos e por vezes, o rosto) e como um porto seguro (quando está preocupado o gato procura o dono).

O gato não se relaciona bem com outras pessoas (é até provável que se esconda quando, por exemplo, há visitas).

Este gato aprendeu que as coisas boas acontecem quando o dono está por perto (por exemplo: o dono fica com o gato enquanto ele come) então faz um esforço considerável para se manter próximo do dono (podendo até ser considerado pegajoso). A separação pode ser problemática (o gato pode não comer se o dono estiver ausente) o que pode sugerir que o gato tem alguns problemas para controlar as suas frustrações.

Esta relação é comum em gatos que vivem em casa de uma só pessoa, sem acesso ao exterior.

### A AMIZADE

O dono está emocionalmente investido no gato (preocupa-se com o gato, vê-o como um bom amigo ou como parte da família) e procura brincar com ele; o gato comporta-se de forma calorosa e amigável com o dono (senta-se muitas vezes no seu colo), que é visto não apenas como parte do mesmo grupo social (o gato regularmente lambe as mãos e o rosto do dono), mas também como um porto seguro (alguém onde encontrar conforto quando preocupado).

O gato relaciona-se bem com outras pessoas (cumprimenta ou inspeciona pessoas que venham a casa e possivelmente até visita alguns vizinhos).

Apesar de terem uma relação amigável e calorosa, o gato e o dono podem funcionar independentemente. Este gato gosta de estar perto do dono, mas não sente a necessidade de manter proximidade física com o dono (nem sempre segue o dono pela casa e pode até retirar-se para um local preferido) e é provável que a separação não seja problemática.

Essa relação parece ocorrer com mais frequência em famílias onde existe mais de um gato, e estes gatos geralmente têm algum tipo de acesso ao exterior.

### RELAÇÃO ABERTA

Os gatos neste tipo de relação refletem a visão prototípica do gato como um animal solitário e independente, que deveria ter acesso ao exterior. Estes gatos relacionam-se bem com outras pessoas (são propensos a cumprimentar visitantes ou

visitar vizinhos) e têm alguma afiliação com o dono, mas têm pouca necessidade de proximidade com ele e podem ser vistos como indiferentes (possivelmente não se vão sentar no colo do dono ou lambe-lhe as mãos ou o rosto).

#### RELAÇÃO REMOTA

Os gatos, neste tipo de relacionamento, são cuidados, mas normalmente não são considerados amigos próximos ou parte da família e mesmo que o comportamento do gato em relação ao dono seja bastante amigável, isso não se traduz, necessariamente, em proximidade emocional.

Estes gatos preferem manter distância das pessoas (donos e outros), possivelmente por falta de confiança. Os gatos não vão lambe as mãos ou o rosto do dono e, mesmo quando preocupados, não o vão procurar.

#### RELAÇÃO CASUAL

Estes gatos preferem a vida ao ar livre e podem até estar fora de casa por vários dias de cada vez. Eles costumam visitar várias casas no seu território (possivelmente tendo mais do que um lar!)

Mesmo que estes gatos se comportem de maneira amigável com o seu dono, não é provável que tentem ficar perto dele (na verdade, eles podem até mesmo fazer um esforço para manter alguma distância entre eles e os seus donos).
